# Supplementary material for: Photodynamic properties of tungsten iodide clusters incorporated into silicone: A2[M6I8L6]@silicone
Source: Royal Society of Chemistry journal article supplement (doi:10.1039/d0ra04280c), 2020-01-01
Supplement: d0ra04280c1.pdf [file d0ra04280c1.pdf]

## Photodynamic Properties of Tungsten Iodide Clusters, incorporated into silicone: $A_2[M_6I_8L_6]@silicone$

Thorsten Hummel,<sup>a</sup> Danuta Dutczak,<sup>a</sup> Alexander Y. Alekseev,<sup>b,c</sup> Lyubov S. Adamenko,<sup>b</sup>  
Michael A. Shestopalov,<sup>d</sup> Yuri V. Mironov,<sup>d</sup> David Enseling,<sup>e</sup> Thomas Jüstel,<sup>e</sup> Hans-Jürgen Meyer<sup>a\*</sup>

---

<sup>a</sup> Section for Solid State and Theoretical Inorganic Chemistry, Institute of Inorganic Chemistry, University of Tübingen, Auf der Morgenstelle 18, 72076 Tübingen, Germany.

<sup>b</sup> Federal Research Centre for Basic and Translational Medicine, 2 Timakova St., 630090 Novosibirsk, Russia.

<sup>c</sup> Dagestan State University, 43a Gadzhievya Street, 367000, Makhachkala, Dagestan, Russia

<sup>d</sup> Nikolaev Institute of Inorganic Chemistry SB RAS, 3 Acad. Lavrentieva, 630090 Novosibirsk, Russia.

<sup>e</sup> Department of Chemical Engineering, Münster University of Applied Science, Stegerwaldstraße 39, 48565 Steinfurt, Germany.

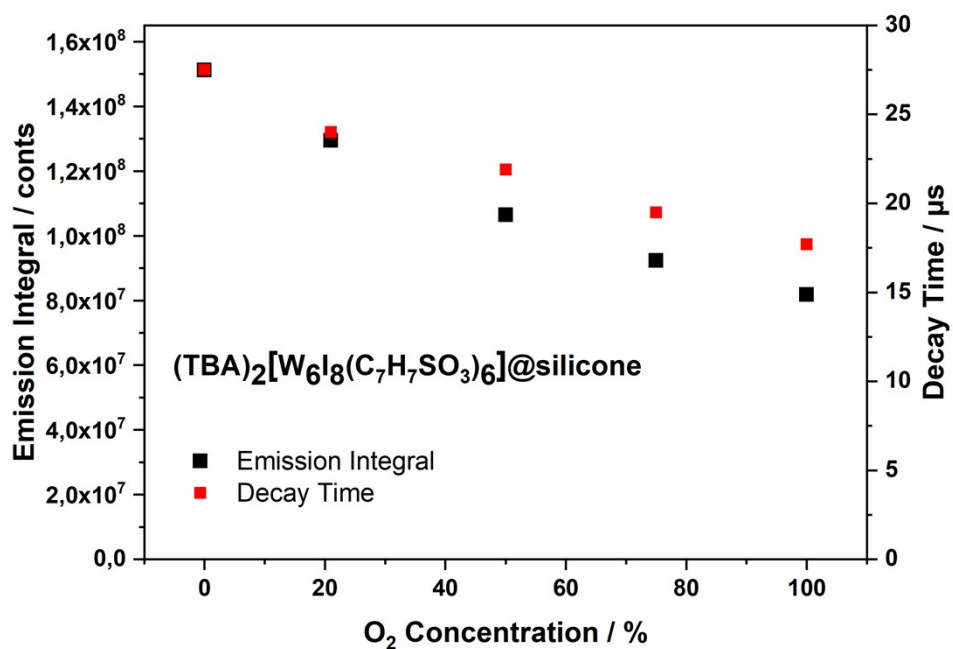

Fig. S1 Emission integral and decay times of (TBA)<sub>2</sub>[W<sub>6</sub>I<sub>8</sub>(C<sub>7</sub>H<sub>7</sub>SO<sub>3</sub>)<sub>6</sub>] incorporated into silicone.

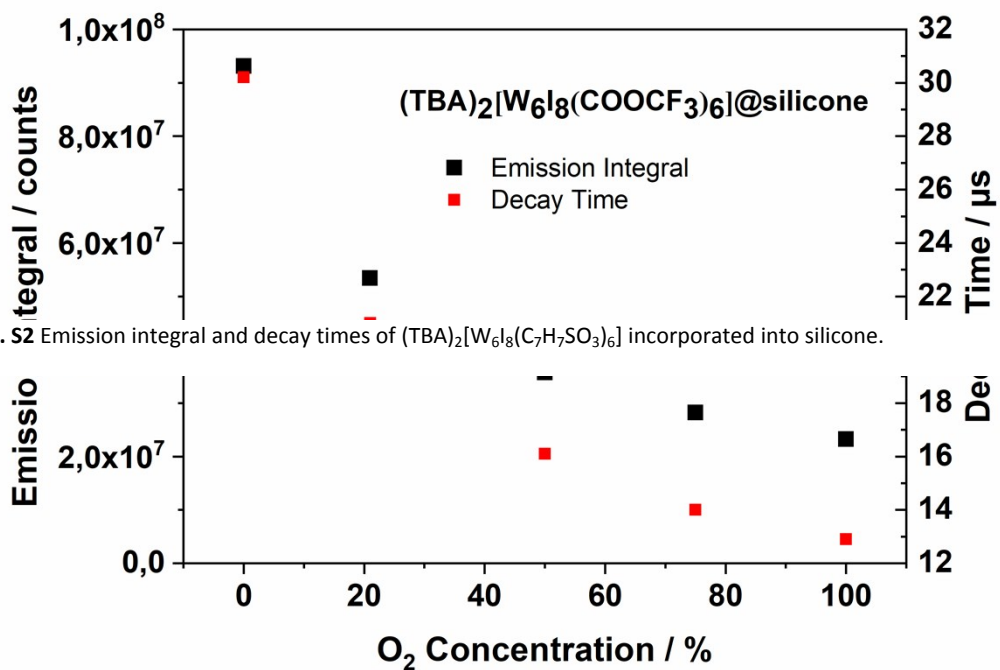

Fig. S2 Emission integral and decay times of (TBA)<sub>2</sub>[W<sub>6</sub>I<sub>8</sub>(C<sub>7</sub>H<sub>7</sub>SO<sub>3</sub>)<sub>6</sub>] incorporated into silicone.

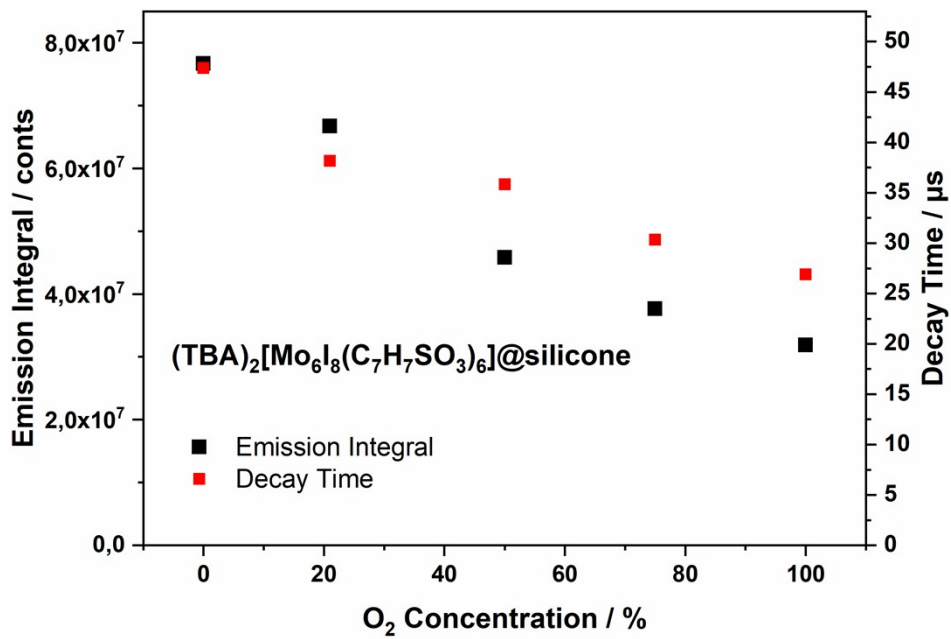

Fig. S3 Emission integral and decay times of  $(TBA)_2[W_6I_8(C_7H_7SO_3)_6]$  incorporated into silicone.

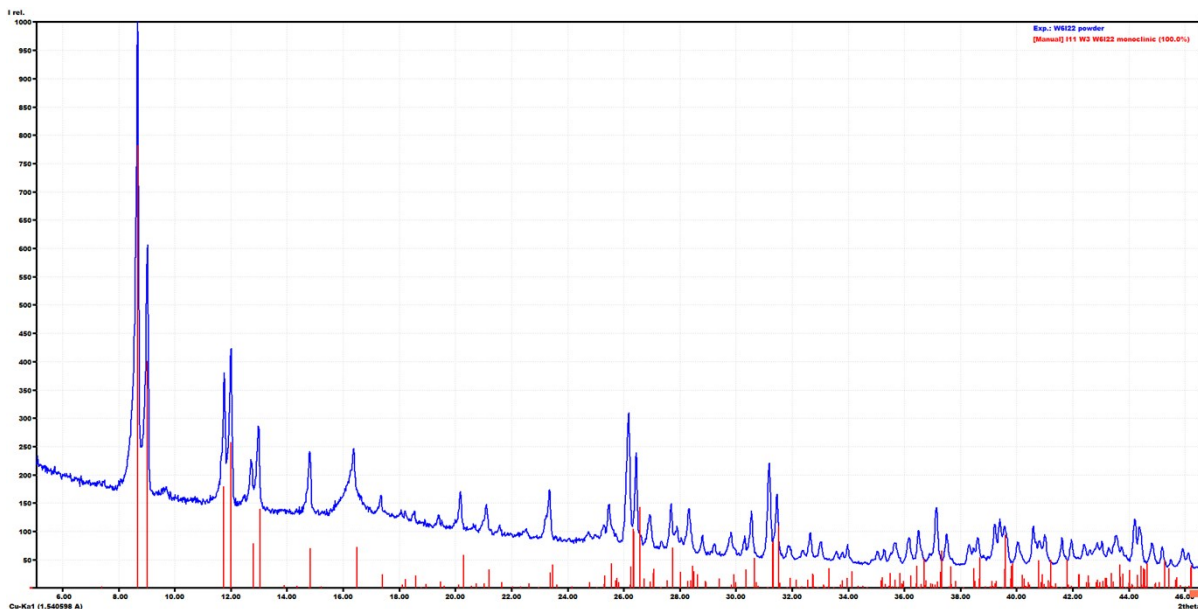

Fig. S4 X-ray powder pattern of  $W_6I_{22}$  powder (blue lines) and the calculated pattern from single crystal data (red lines).

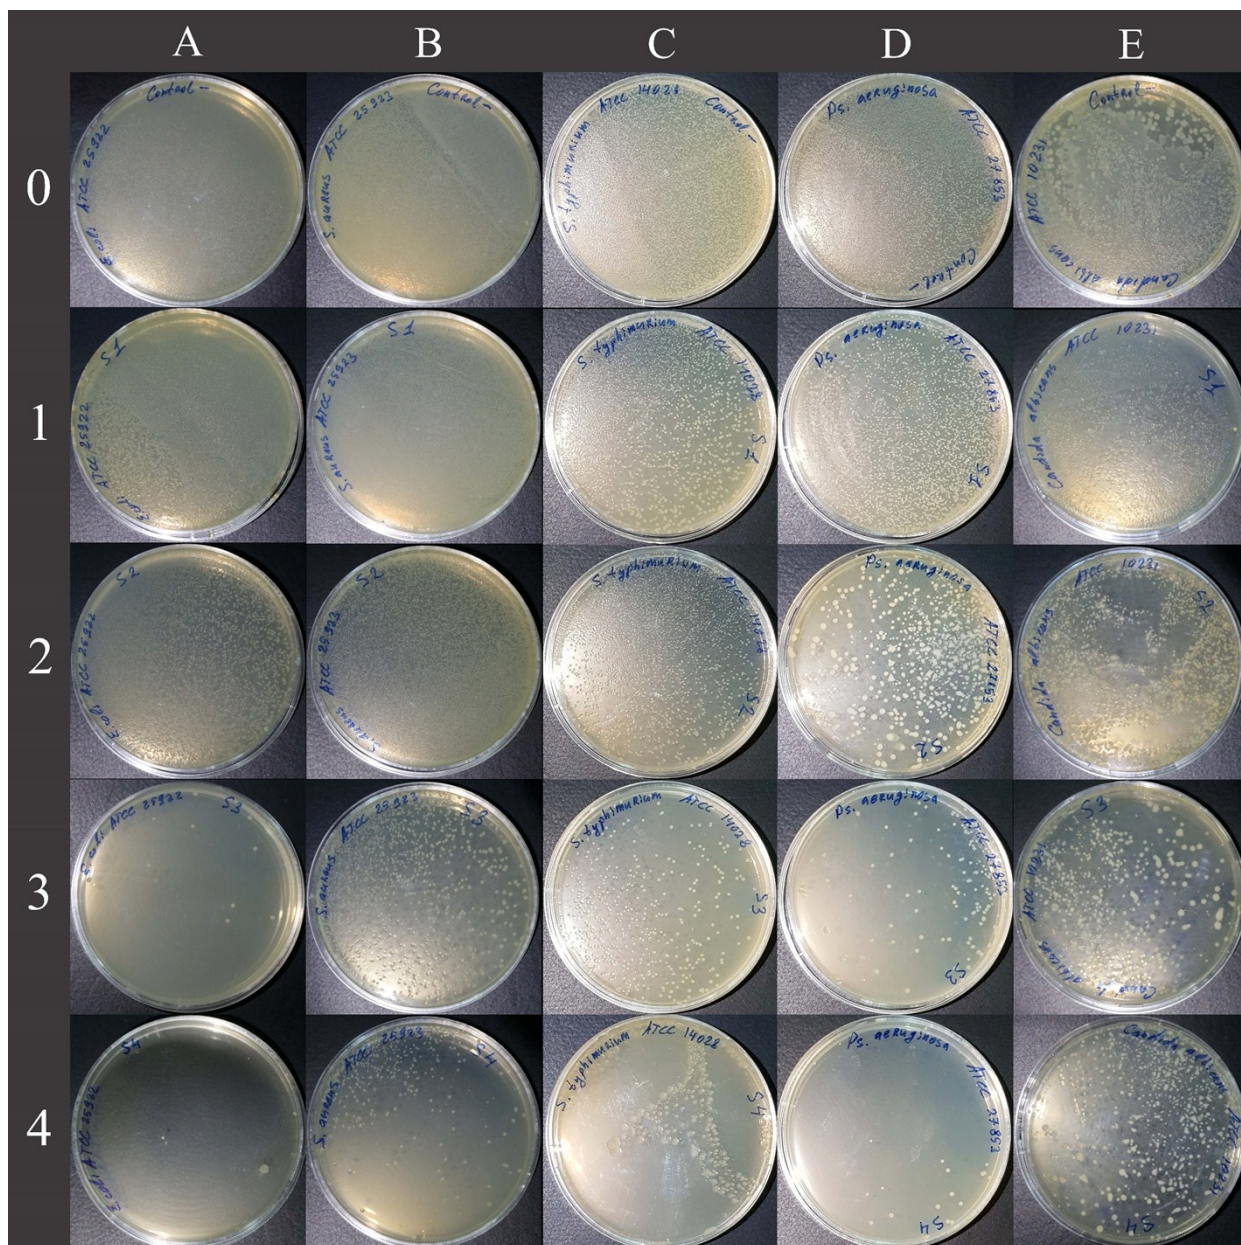

**Fig. S5** Photographs of microorganisms' growth in LB agar culture media after light irradiation of silicon strips. 0 – Negative control (without lighting), 1 – Neat silicone, 2 –  $(\text{TBA})_2[\text{Mo}_6\text{I}_8(\text{C}_7\text{H}_7\text{SO}_3)_6]@\text{silicone}$ , 3 –  $(\text{TBA})_2[\text{W}_6\text{I}_8(\text{COOCF}_3)_6]@\text{silicone}$ , 4 –  $(\text{TBA})_2[\text{W}_6\text{I}_8(\text{C}_7\text{H}_7\text{SO}_3)_6]@\text{silicone}$ ; A – *E. coli*, B – *S. aureus*, C – *S. typhimurium*, D – *P. aeruginosa*, E – *C. albicans* (Fungi)
